# Supplementary material for: The Effect of a Combined Hydrogen Peroxide-MlrA Treatment on the Phytoplankton Community and Microcystin Concentrations in a Mesocosm Experiment in Lake Ludoš
Source: MDPI journal article supplement (doi:10.3390/toxins11120725), 2019-12-11

Figure S1 a. The growth of H<sub>2</sub>O<sub>2</sub>-treated *M. aeruginosa* culture. The white blocks represent the control culture, whereas the light-grey and dark-grey blocks represent cultures treated with 2 and 3 mg l<sup>-1</sup> of H<sub>2</sub>O<sub>2</sub>, respectively. The errors bars indicate standard deviation.

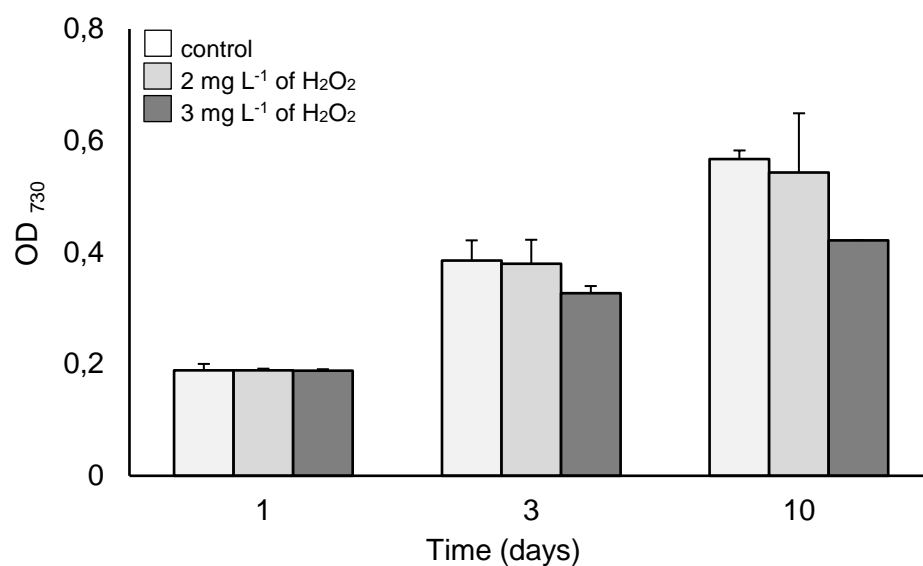

Figure S1 b. The intracellular amount of MC calculated per OD<sub>730</sub> = 1.

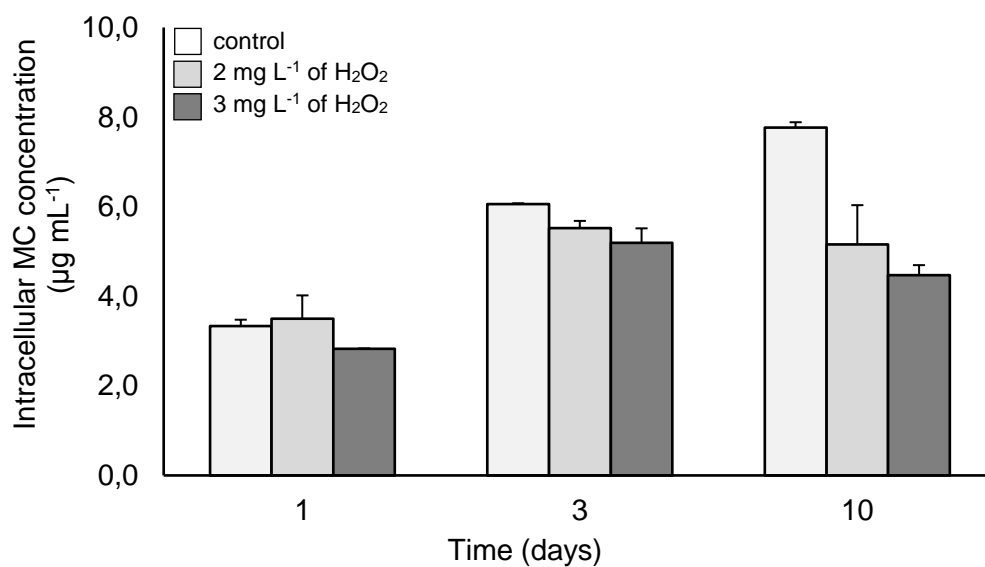

Supplement: s1 [file s1]
