# Supplementary material for: The Effect of a Combined Hydrogen Peroxide-MlrA Treatment on the Phytoplankton Community and Microcystin Concentrations in a Mesocosm Experiment in Lake Ludoš
Source: MDPI journal article supplement (doi:10.3390/toxins11120725), 2019-12-11
Supplement: s1 [file s1]

Table S1. *mcyB*\_M2q and *mcyE*\_M2q primers

| gene | name      | sequence 5'-3'         | amplicon length |
|------|-----------|------------------------|-----------------|
| mcyB | mcyB_M2qF | CCTCAGACAATCAACGGTTAGT | 119             |
|      | mcyB_M2qR | AAAGGCAGAAGGCACCATATAA |                 |
| mcyE | mcyE_M2qF | CTGGTGGGAAAGGACTGATTTA | 95              |
|      | mcyE_M2qR | CGCCCTCAAGTCAAGAAAGA   |                 |
